# Supplementary material for: Bovine apo-lactoferrin affects the secretion of proteases in Mannheimia haemolytica A2
Source: PubMed Central journal article supplement — Access Microbiol. 2021 Oct 25;3(10):000269. doi: 10.1099/acmi.0.000269 (PMC8604176; doi:10.1099/acmi.0.000269), 2021-10-25
Supplement: acmi-3-0269-s001.pdf [file acmi-3-0269-s001.pdf]

1 **Supplementary Table 1. MIC of *M. haemolytica* A2.**

2 A)

|      | 10 <sup>6</sup> CFU | Ct            | 7.5 μM        | 11.5 μM       | 15. 5 μM      | 19.5 μM       | 23.5 μM       |
|------|---------------------|---------------|---------------|---------------|---------------|---------------|---------------|
| O.D. | 0.024+/-0.005       | 0.461+/-0.016 | 0.433+/-0.033 | 0.076+/-0.014 | 0.029+/-0.007 | 0.021+/-0.012 | 0.007+/-0.010 |

3

4 B)

|      | 10 <sup>6</sup> CFU | Ct            | 7.5 μM        | 11.5 μM       | 15. 5 μM      | 19.5 μM       | 23.5 μM       |
|------|---------------------|---------------|---------------|---------------|---------------|---------------|---------------|
| O.D. | 0.023+/-0.005       | 0.158+/-0.015 | 0.170+/-0.013 | 0.112+/-0.008 | 0.033+/-0.014 | 0.027+/-0.010 | 0.012+/-0.013 |

5

6 **OD<sub>595</sub> values for MIC was obtained by the microdilution technique in broth.** Cultures were  
7 carried out in agitation (200 RPM) (A) or **static** conditions (B) at 37 °C/24 h. **The initial inoculum**  
8 **corresponded to 10<sup>6</sup> CFU (O.D. of 0.02) of *M. haemolytica* A2. Ct, control sample without apo-BLf**  
9 **treatment. The values are reported in O.D.<sub>595</sub> nm. and are the average of six independent**  
10 **experiments.**

11

12

13

14

15

16

17

A)

Results for Job *Bovine lactoferrin*

|                     |                                     |
|---------------------|-------------------------------------|
| <b>Email:</b>       | garnvz@gmail.com                    |
| <b>Job Code:</b>    | 91ff07154e7edf47e586bf029a3267da-46 |
| <b>Description:</b> | Bovine lactoferrin                  |

Download the text file of prediction results, suitable for import into spreadsheet software or R

Predicted cleavage sites of multiple protease families

```

M K L F V P A L L S L G A L G L C L A A P R K N V R W C T I S Q P E W F K C R R W Q W R M K K L G A P S I T C V R R A F A L E C I R A
I A E K K A D A V T L D G G M V F E A G R D P Y K L R P V A A E I Y G T K E S P Q T H Y Y A V A V V K G S N F Q L D Q L Q G R K S C
H T G L G R S A G W V I P M S I L R P Y L S W T E S L E P L Q G A V A K F F S A S C V P C I D R Q A Y P N L C Q L C K G E G E N Q C A
C S S R E P Y F G Y S G A F K C L Q D G A G D V A F V K E T T V F E N L P E K A D R D Q Y E L L C L N N S R A P V D A F K E C H L A Q
V P S H A V V A R S V D G K E D L I W K L L S K A Q E K F G K N K S R S F Q L F G S P P G Q R D L L F K D S A L G F L R I P S K V D S
A L Y L G S R Y L T T L K N L R E T A E E V K A R Y T R V V M C A V G P E E Q K K C Q Q W S Q S G Q N V T C A T A S T T D D C I V L
V L K G E A D A L N L D G G Y I Y T A G K C G L V P V L A E N R K T S K Y S S L D C V L R P T E G Y L A V A V V K K A N E G L T W N S
L K D K X S C H T A V D R T A G W N I P M G L I V N Q T G S C A F D E F F S Q S C A P G R D P K S R L C A L C A G D D Q G L D K C V P
N S K E K Y Y G Y T G A F R C L A E D V G D V A F V K N D T V W E N T N G E S T A D W A K N L N R E D F R L L C L D G T R K P V T E A
Q S C H L A V A P N H A V V S R S D R A A H V K Q V L L H Q Q A L F G K N G K N C P D K F C L F K S E T K N L L F N D N T E C L A K L
G G R P T Y E E Y L G T E Y V T A I A N L K K C S T S P L L E A C A F L T R
    
```

- Cleaved by Aspartic protease after this residue (P1 position)
- Cleaved by Metalloprotease protease after this residue (P1 position)
- Cleaved by Cysteine protease after this residue (P1 position)
- Cleaved by Serine protease after this residue (P1 position)
- Cleaved by different multiple protease superfamilies after this residue (P1 position)

B)

|  |            |            |            |             |             |
|--|------------|------------|------------|-------------|-------------|
|  | 10         | 20         | 30         | 40          |             |
|  | MKLFVPALLS | LGALGLCLAA | PRKNVRWCTI | SQPEWFKCRR  | WQWRMKKLGA  |
|  | 60         | 70         | 80         | 90          | 100         |
|  | PSITCVRRAF | ALECIRAIAE | KKADAVTLDG | GHVFEAGRDP  | YKLRPVAAEI  |
|  | 110        | 120        | 130        | 140         | 150         |
|  | YGTKESPQTH | YYAVAVVKKG | SNFQLDQLQG | RKSCHTGLGR  | SAGWIIPMGI  |
|  | 160        | 170        | 180        | 190         | 200         |
|  | LRPYLSWTES | LEPLQGAVAL | FFSASCVPIC | DRQAYPNLCQ  | LCKGEGENQC  |
|  | 210        | 220        | 230        | 240         | 250         |
|  | ACSSREPYFG | YSGAFKCLQD | GAGDVAFVKE | TTVFENLPEK  | ADRQYELLCC  |
|  | 260        | 270        | 280        | 290         | 300         |
|  | LNNSRAPVDA | FKECHLAQVP | SHAVVARSVD | GKEDLIWKLL  | SKAQEKFGKN  |
|  | 310        | 320        | 330        | 340         | 350         |
|  | KSRSFQLFGS | PPGQRDLLFK | DSALGFRLIP | SKVDSALYLG  | SRYLTLKLN   |
|  | 360        | 370        | 380        | 390         | 400         |
|  | RETAEVVKAR | YTRVVWCAVG | PEEQKKCQW  | SQSGQWVTC   | ATASTDDCI   |
|  | 410        | 420        | 430        | 440         | 450         |
|  | VLVLKGEADA | LNLDDGGIYT | AGKCGLVPVL | AENRKSSEKHS | SLDCVLRPTE  |
|  | 460        | 470        | 480        | 490         | 500         |
|  | GYLAVAVVKK | ANEGLTWNLS | KDKKSCHTAV | DRTAGWNIPM  | GLIVNQTGSC  |
|  | 510        | 520        | 530        | 540         | 550         |
|  | AFDEFFSQSC | APGADPKSRL | CALCAGDDQG | LDKCVPSKE   | KYYGYTGAFR  |
|  | 560        | 570        | 580        | 590         | 600         |
|  | CLAEDVGDVA | FKNDTVWEN  | TNGESTADWA | KNLNREDFRL  | LCLDGTTRKPV |
|  | 610        | 620        | 630        | 640         | 650         |
|  | TEAQSCHLAV | APNHAVVRS  | DRAAHVKQVL | LHQALFGKN   | GKNCPDKFCL  |
|  | 660        | 670        | 680        | 690         | 700         |
|  | FKSETKNLLF | NDNTECLAKL | GGRPTYEYVL | GTEYVTAIAN  | LKKCSTSPLL  |
|  |            |            |            |             | EACAFLTR    |

22 **Supplementary Figure 1. Susceptible cleavage sites of BLf by proteases. A.** Predicted sites of  
23 cleavage by proteases. **B.** Antimicrobial peptides, Lcins and lactoferrampin obtained by cleavage  
24 of metallo- and cysteine- proteases. Results obtained with the protease cleavage prediction  
25 software PROSPER (<https://prosper.erc.monash.edu.au/>).

26

27

28

29

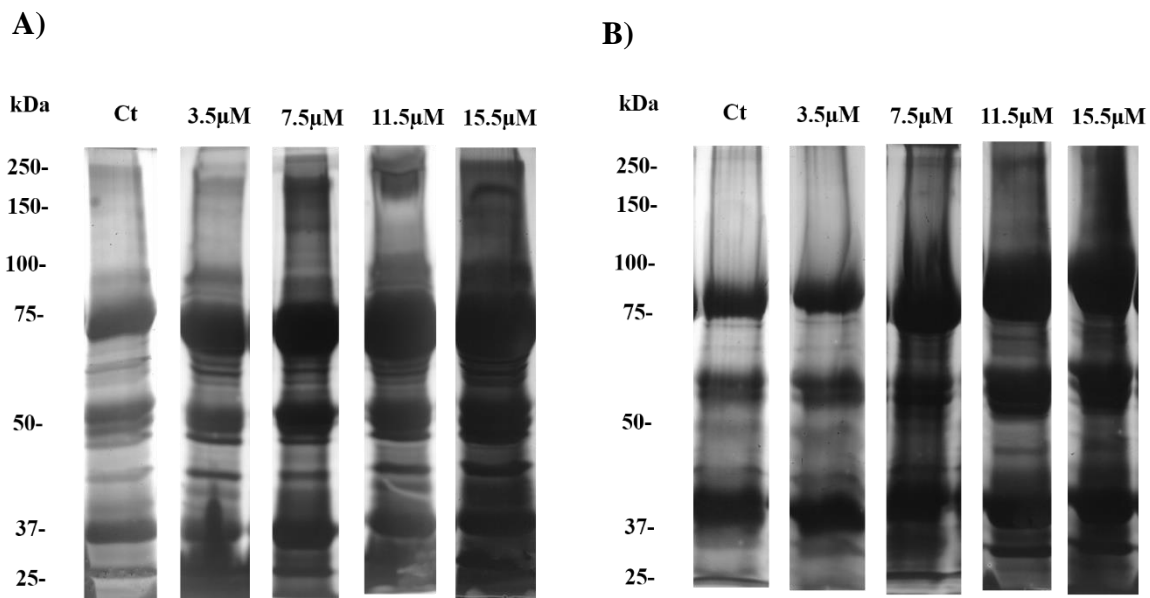

30

31 **Supplementary Figure 2.** SDS-PAGE of outer membrane vesicles (OMVs) (A) and culture  
32 supernatants (CS) (B) proteins from *M. haemolytica* A2 cultured in the presence of apo-BLf. Ct,  
33 control sample without apo-BLf. Electrophoresis was performed at 10%. A result representative of  
34 three independent experiments is shown.

35

36

37
